# Supplementary material for: Biocompatible MOF-808 as an iodophor antimicrobial agent with controlled and sustained release of iodine
Source: Royal Society of Chemistry journal article supplement (doi:10.1039/d1ce00019e), 2021-01-01
Supplement: d1ce00019e1.pdf [file d1ce00019e1.pdf]

**Supplementary information**

**Biocompatible MOF-808 as an Iodophor Antimicrobial Agent with Controlled and Sustained Release of Iodine**

**Mojdeh Nakhaei, Kamran Akhbari\*, Alireza Davoodi**

School of Chemistry, College of Science, University of Tehran, Tehran, Iran.

P.O. Box 14155-6455; Tel.: +98 21 61113734; fax: +98 21 66495291. E-mail address:

[akhbari.k@khayam.ut.ac.ir](mailto:akhbari.k@khayam.ut.ac.ir)

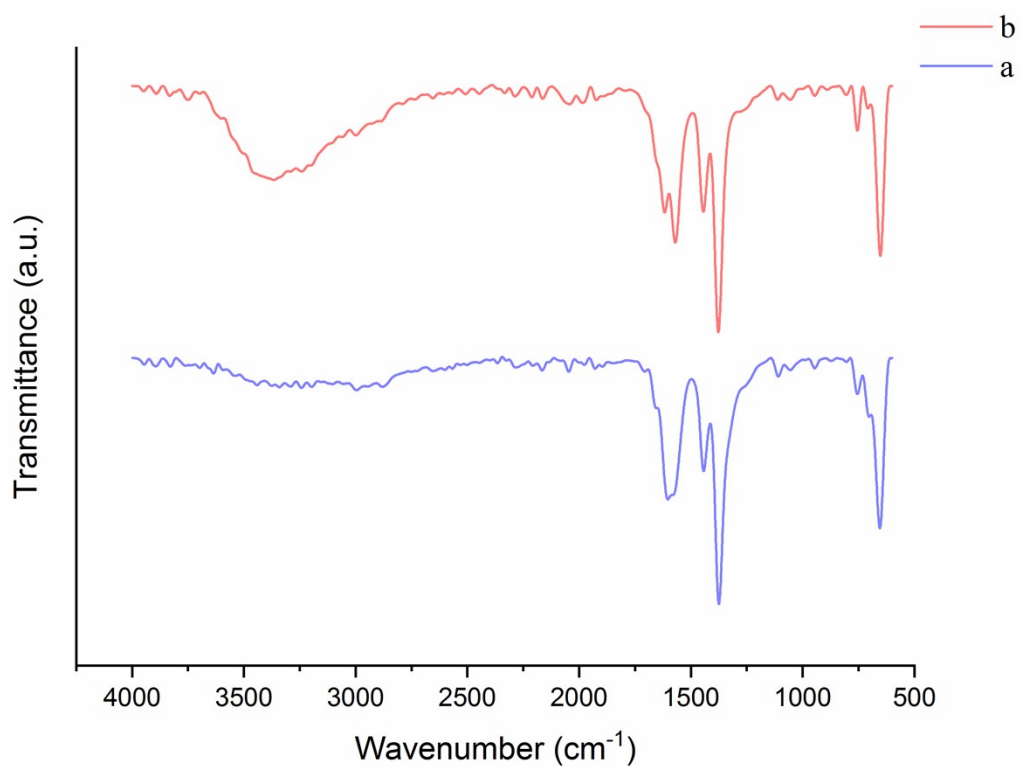

**Figure S1.** IR spectra of a) activated MOF-808 and b) I<sub>2</sub>@MOF-808.

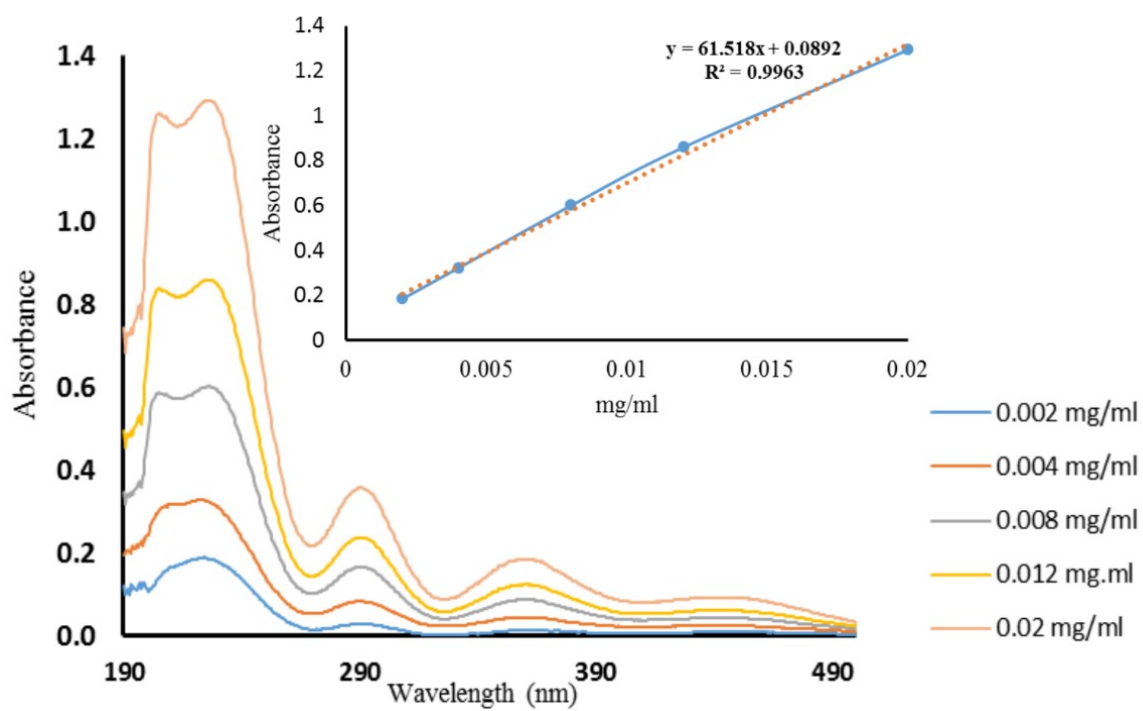

**Figure S2.** Calibration plot of standard iodine by UV/vis spectra

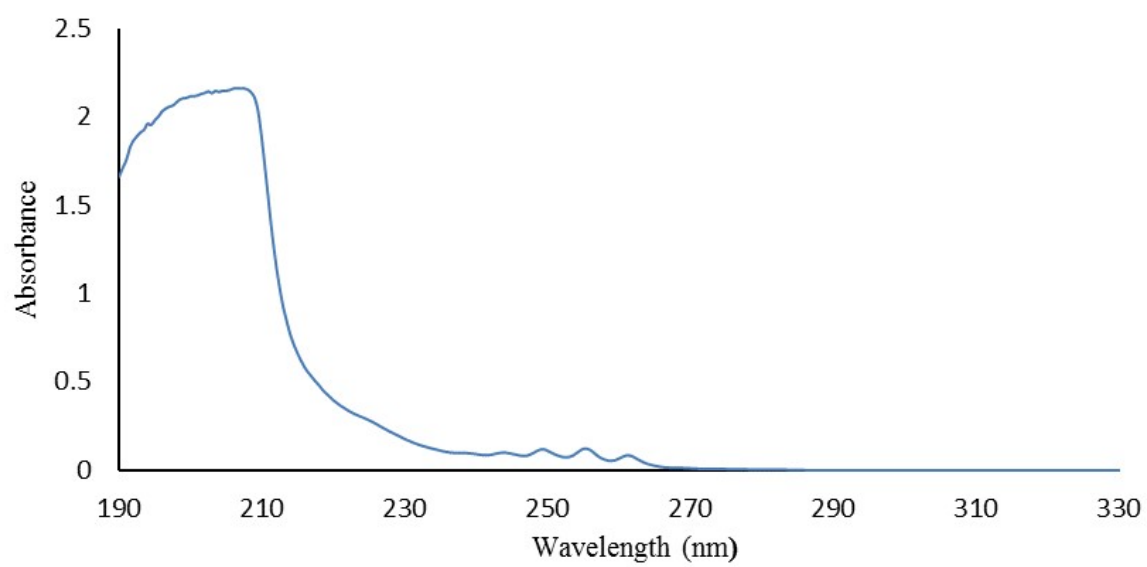

**Figure S3.** Baseline control of cyclohexane.

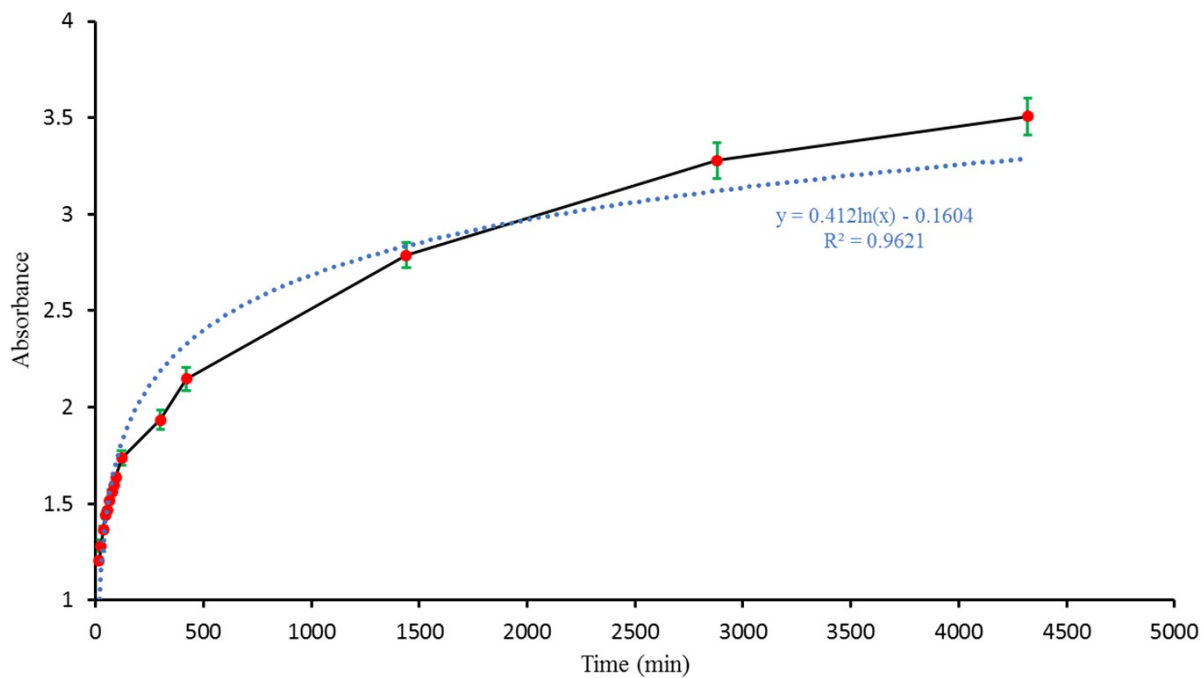

**Figure S4.** Fit-curves of I<sub>2</sub> release from I<sub>2</sub>@MOF-808 up to three days.

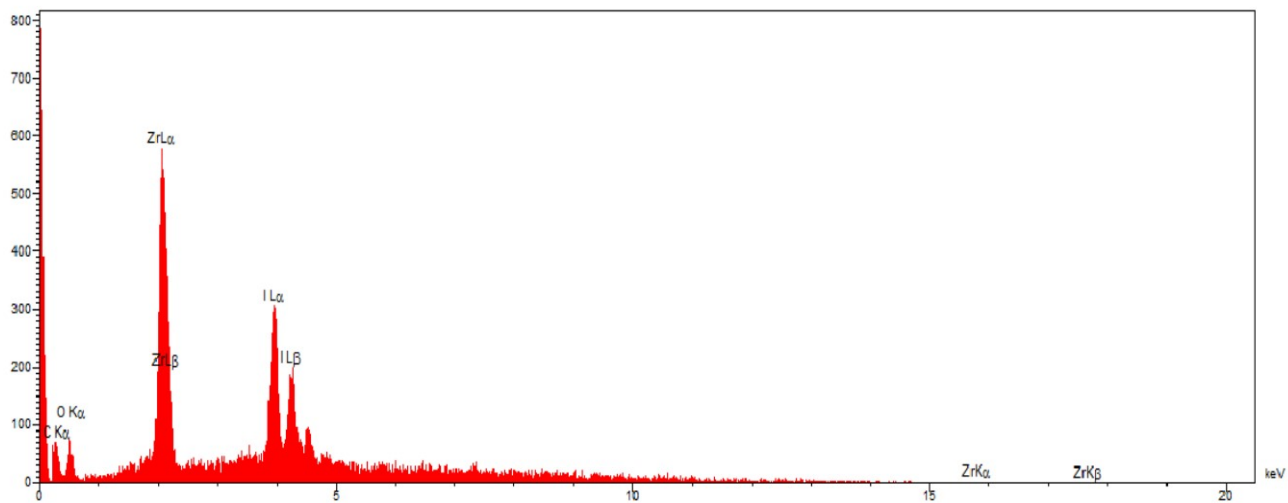

**Figure S5.** EDS spectrum of I<sub>2</sub>@MOF-808.

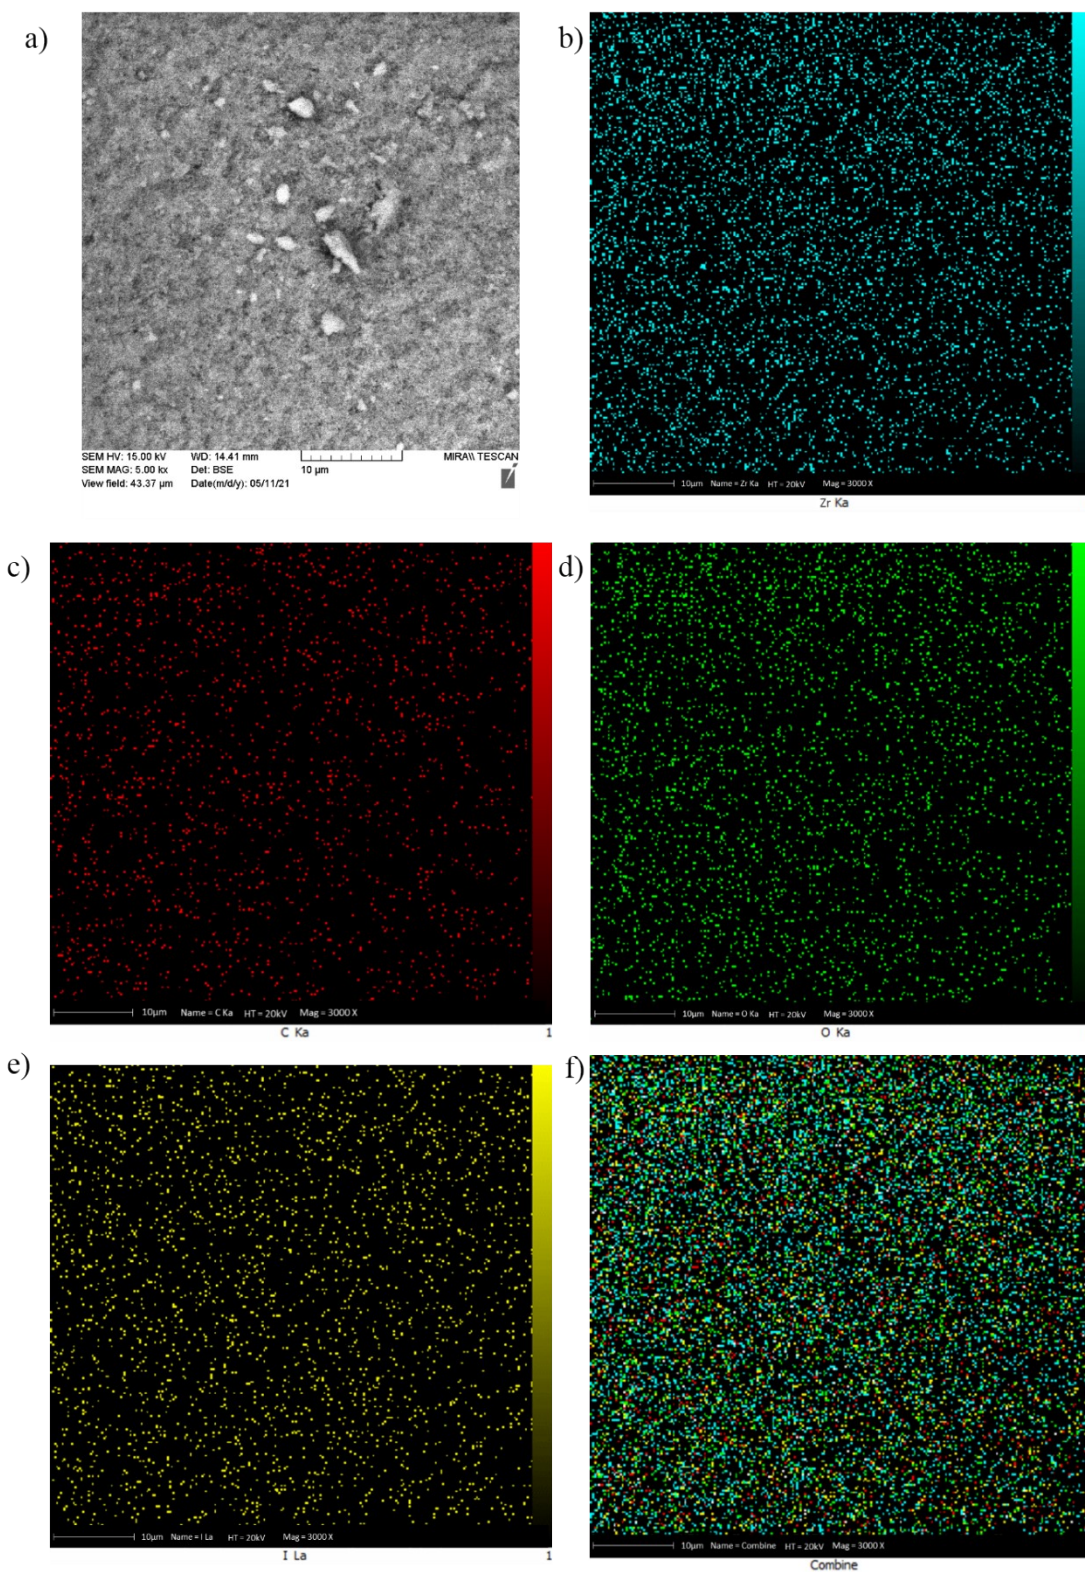

**Figure S6.** a) Area of the EDAX measurement and EDS elemental mapping of b) Zr, c) C, d) O, e) I and f) combined analysis in  $I_2@MOF-808$ .

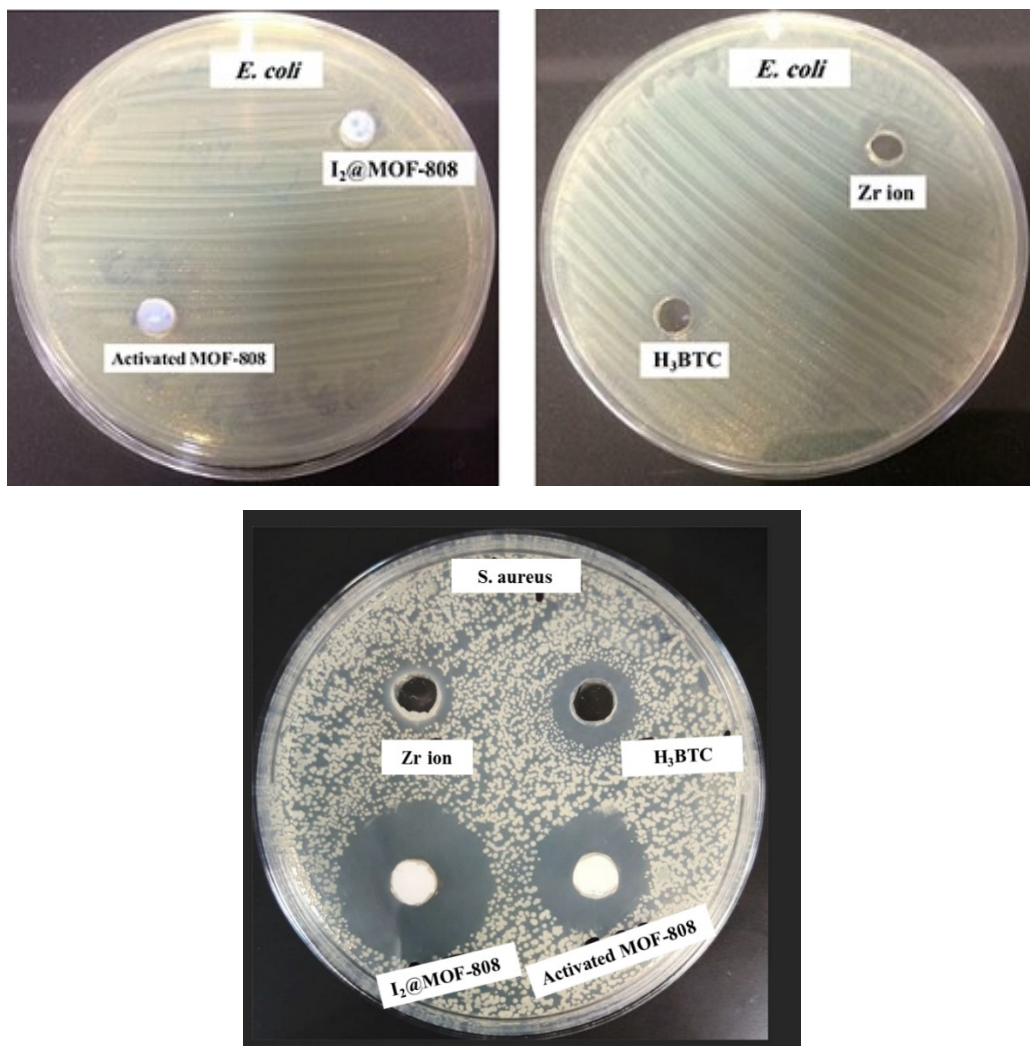

**Figure S7.** Antimicrobial activity of  $I_2@MOF-808$ , MOF-808,  $H_3BTC$  and Zr ion against *S. aureus* (first trial) and *E. coli*.



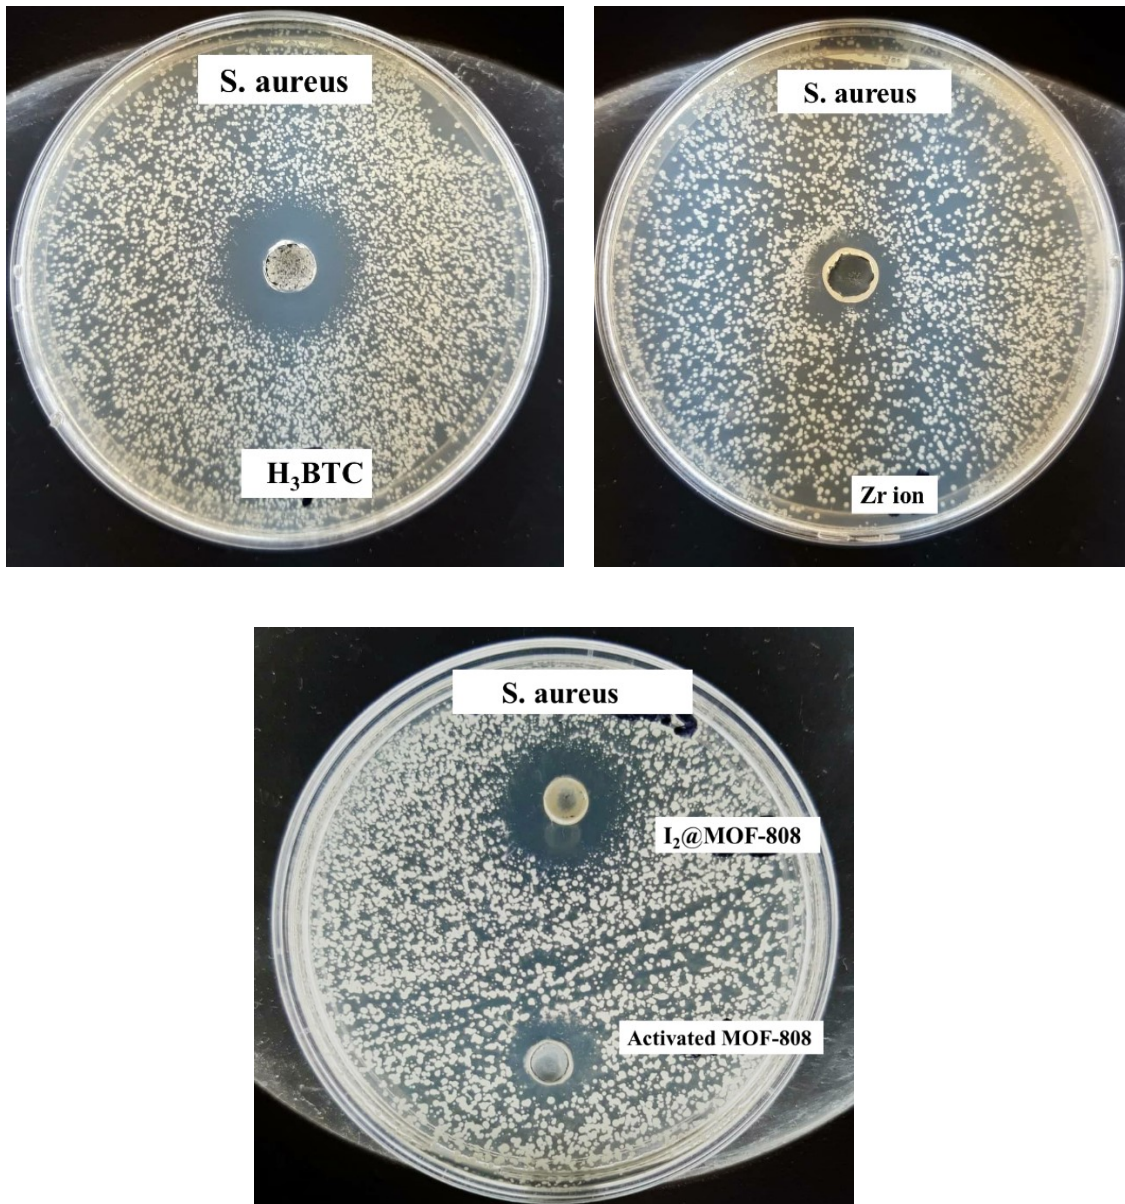

**Figure S8.** Antimicrobial activity of I<sub>2</sub>@MOF-808, MOF-808, H<sub>3</sub>BTC and Zr ion against *S. aureus* (second trial).
